# Supplementary material for: Variations in Yield, Essential Oil, and Salicylates of Filipendula ulmaria Inflorescences at Different Blooming Stages
Source: MDPI journal article supplement (doi:10.3390/plants12020300), 2023-01-08
Supplement: s1 [file s1]

**Supplementary Table S1.** Essential oil composition of *Filipendula ulmaria* inflorescences collected from different habitats in early and late blooming stages.

| Compound name            | RI <sup>Lit.</sup> /RI <sup>Calc.</sup> | Habitat     |            |             |            |             |            |             |            |             |            |
|--------------------------|-----------------------------------------|-------------|------------|-------------|------------|-------------|------------|-------------|------------|-------------|------------|
|                          |                                         | Biržai      |            | Pabiržė     |            | Kernavė     |            | Vilnius     |            | Mikniškės   |            |
|                          |                                         | early stage | late stage |
|                          |                                         | Content (%) |            |             |            |             |            |             |            |             |            |
| (2E)-Heptenal            | 954/954                                 | nd.         | nd.        | nd.         | 0.1        | nd.         | tr.        | nd.         | tr.        | tr.         | 0.1        |
| Benzaldehyde             | 960/960                                 | 0.2         | nd.        | nd.         | tr.        | nd.         | 0.1        | 0.1         | 0.2        | 0.2         | 0.2        |
| 6-methyl-Hept-5-en-2-one | 985/986                                 | nd.         | nd.        | nd.         | 0.1        | nd.         | tr.        | nd.         | nd.        | nd.         | tr.        |
| 2-Penthyl furan          | 988/989                                 | tr.         | tr.        | 0.1         | 0.2        | nd.         | 0.1        | tr.         | 0.1        | tr.         | 0.1        |
| Octanal                  | 998/998                                 | tr.         | nd.        | tr.         | 0.1        | nd.         | 0.1        | tr.         | 0.1        | 0.1         | 0.1        |
| Salicylaldehyde          | 1039/1040                               | 79.7        | 94.8       | 68.9        | 39.6       | 71.3        | 76.8       | 73.6        | 57.8       | 67.9        | 59.3       |
| Octanol                  | 1068/1069                               | nd.         | nd.        | tr.         | 0.3        | nd.         | 0.1        | nd.         | 0.2        | nd.         | 0.2        |
| cis-Linalool oxide       | 1072/1073                               | tr.         | nd.        | nd.         | nd.        | nd.         | tr.        | tr.         | nd.        | 0.1         | nd.        |
| Linalool                 | 1096/1096                               | 0.7         | 0.5        | 0.9         | 1.3        | 0.6         | nd.        | 0.7         | 1.7        | 0.9         | 1.0        |
| Nonanal                  | 1100/1100                               | 1.5         | 2.2        | 2.0         | 5.0        | 1.4         | 3.7        | 1.5         | 3.1        | 2.3         | 3.2        |
| Lilac aldehyde A         | 1152/1153                               | 0.3         | nd.        | 0.2         | 0.1        | nd.         | 0.1        | 0.4         | 0.2        | 0.5         | 0.3        |
| Lilac aldehyde B         | 1154/1154                               | 0.4         | tr.        | 0.3         | nd.        | 0.2         | 0.1        | 0.7         | 0.3        | 0.8         | 0.4        |

|                       |           |     |     |      |      |      |      |      |      |      |      |
|-----------------------|-----------|-----|-----|------|------|------|------|------|------|------|------|
| Unknown               | -/1157    | nd. | nd. | nd.  | nd.  | nd.  | 0.1  | nd.  | 0.1  | nd.  | 0.1  |
| Lilac aldehyde C      | 1159/1160 | nd. | nd. | nd.  | 0.1  | 0.3  | nd.  | nd.  | nd.  | nd.  | nd.  |
| (2E)-Nonen-1-al       | 1161/1161 | nd. | nd. | tr.  | 0.2  | nd.  | 0.1  | tr.  | 0.1  | tr.  | 0.1  |
| Lilac aldehyde D      | 1161/1161 | 0.2 | nd. | 0.1  | 0.1  | nd.  | 0.1  | 0.3  | 0.1  | 0.3  | 0.2  |
| Nonanol               | 1172/1172 | nd. | nd. | nd.  | 0.1  | nd.  | 0.1  | nd.  | nd.  | nd.  | 0.1  |
| $\alpha$ -Terpineol   | 1188/1189 | nd. | 0.2 | nd.  | nd.  | 0.1  | nd.  | nd.  | nd.  | nd.  | nd.  |
| Methyl salicylate     | 1190/1190 | 14  | tr. | 20.1 | 24.5 | 21.5 | 12.9 | 15.8 | 24.0 | 20.6 | 24.1 |
| para-Menth-1-ene-9-al | 1217/1218 | tr. | nd. | 0.1  | 0.1  | nd.  | tr.  | 0.1  | 0.1  | 0.1  | 0.1  |
| $\beta$ -Cyclocitral  | 1219/1219 | nd. | nd. | nd.  | 0.1  | nd.  | tr.  | nd.  | tr.  | nd.  | tr.  |
| Nerol                 | 1229/1229 | 0.1 | nd. | 0.1  | 0.1  | nd.  | 0.1  | 0.1  | 0.1  | 0.1  | 0.1  |
| Carvone               | 1243/1242 | nd. | nd. | tr.  | 0.1  | nd.  | 0.1  | tr.  | 0.1  | tr.  | tr.  |
| Geraniol              | 1252/1253 | nd. | 0.2 | 0.1  | 0.7  | nd.  | 0.3  | 0.1  | 0.3  | 0.1  | 0.2  |
| para-Anisaldehyde     | 1252/1254 | 0.8 | nd. | 0.5  | nd.  | nd.  | 0.1  | 1.1  | 0.2  | 1.3  | 0.3  |
| (2E)-Decenal          | 1263/1263 | nd. | nd. | nd.  | 0.2  | nd.  | 0.1  | nd.  | 0.1  | nd.  | 0.1  |
| Geranial              | 1268/1268 | nd. | nd. | tr.  | nd.  | nd.  | nd.  | nd.  | tr.  | nd.  | 0.1  |
| Ethyl salicylate      | 1269/1270 | 0.1 | nd. | tr.  | 0.1  | nd.  | 0.1  | tr.  | tr.  | tr.  | nd.  |
| Nonanoic acid         | 1270/1271 | nd. | nd. | nd.  | nd.  | nd.  | 0.2  | nd.  | 0.5  | nd.  | 0.4  |
| (2E,4Z)-Decadienal    | 1292/1293 | nd. | nd. | nd.  | 0.1  | nd.  | nd.  | nd.  | nd.  | nd.  | nd.  |

|                            |           |     |     |     |     |     |     |     |     |     |     |
|----------------------------|-----------|-----|-----|-----|-----|-----|-----|-----|-----|-----|-----|
| Tridecane                  | 1300/1300 | nd. | tr. | nd. | tr. | nd. | 0.1 | nd. | nd. | nd. | nd. |
| Undecanal                  | 1302/1304 | tr. | tr. | 0.1 | 0.4 | nd. | 0.2 | 0.1 | 0.3 | 0.1 | 0.2 |
| (2E,4E)-Decadienal         | 1316/1318 | nd. | nd. | tr. | 0.3 | nd. | 0.1 | tr. | 0.1 | tr. | 0.1 |
| (3Z)-Hexenyl tiglate       | 1321/1320 | nd. | nd. | nd. | 0.1 | nd. | tr. | tr. | tr. | tr. | tr. |
| Unknown                    |           | nd. | nd. | nd. | 0.1 | nd. | tr. | nd. | nd. | tr. | 0.1 |
| 2-Undecenal                | 1376/1277 | nd. | nd. | nd. | 0.2 | nd. | tr. | tr. | tr. | nd. | 0.1 |
| (E)- $\beta$ -Damascenone  | 1383/1383 | 0.1 | 0.1 | 0.2 | 0.3 | 0.1 | 0.1 | 0.1 | 0.2 | 0.2 | 0.2 |
| Unknown                    | -/1387    | 0.1 | 0.1 | 0.1 | 0.4 | nd. | 0.2 | 0.1 | 0.2 | 0.1 | 0.2 |
| $\beta$ -Elemene           | 1390/1390 | nd. | nd. | nd. | 0.1 | nd. | tr. | nd. | tr. | nd. | tr. |
| Dodecanal                  | 1408/1410 | tr. | nd. | tr. | 0.1 | nd. | tr. | tr. | 0.1 | tr. | 0.1 |
| Unknown                    | -/1415    | nd. | nd. | 0.1 | 0.1 | nd. | tr. | 0.1 | 0.1 | nd. | 0.1 |
| (E)-Caryophyllene          | 1419/1420 | tr. | nd. | nd. | 0.1 | nd. | tr. | tr. | tr. | tr. | tr. |
| Neryl acetone              | 1420/1455 | tr. | tr. | tr. | 0.2 | nd. | 0.1 | tr. | 0.1 | tr. | 0.1 |
| Dodecanol                  | 1466/1467 | nd. | nd. | tr. | 0.1 | nd. | tr. | tr. | tr. | tr. | 0.1 |
| (E)- $\beta$ -Ionone       | 1487/1487 | tr. | tr. | tr. | 0.2 | nd. | 0.1 | tr. | 0.1 | tr. | 0.1 |
| $\beta$ -Selinene          | 1490/1490 | nd. | nd. | nd. | 0.1 | nd. | nd. | nd. | nd. | nd. | nd. |
| Benzyl tiglate             | 1497/1498 | tr. | nd. | tr. | tr. | nd. | tr. | tr. | 0.1 | tr. | 0.1 |
| (E,E)- $\alpha$ -Farnesene | 1505/1505 | nd. | tr. | nd. | 0.2 | nd. | tr. | nd. | nd. | nd. | tr. |

|                        |           |     |     |     |     |     |     |     |     |     |     |
|------------------------|-----------|-----|-----|-----|-----|-----|-----|-----|-----|-----|-----|
| Tridecanal             | 1510/1510 | tr. | tr. | tr. | 0.2 | nd. | 0.1 | tr. | 0.2 | 0.1 | 0.1 |
| Unknown                |           | nd. | 0.1 | 0.1 | 0.5 | nd. | 0.2 | 0.1 | 0.2 | 0.1 | 0.2 |
| (E)-Nerolidol          | 1563/1564 | nd. | nd. | nd. | 0.1 | nd. | tr. | nd. | tr. | tr. | tr. |
| (3Z)-Hexenyl benzoate  | 1566/1567 | nd. | nd. | nd. | 0.1 | nd. | tr. | nd. | tr. | tr. | 0.1 |
| Caryophyllene oxide    | 1583/1585 | nd. | nd. | nd. | 0.1 | nd. | nd. | nd. | 0.1 | nd. | 0.1 |
| 2-Phenyl ethyl tiglate | 1585/1586 | nd. | nd. | nd. | 0.1 | nd. | tr. | tr. | nd. | tr. | nd. |
| Tetradecanal           | 1612/1610 | tr. | nd. | tr. | 0.1 | nd. | tr. | tr. | 0.1 | tr. | tr. |
| T-Muurolol             | 1642/1643 | nd. | nd. | nd. | nd. | nd. | tr. | nd. | 0.1 | nd. | 0.1 |
| $\alpha$ -Cadinol      | 1650/1650 | nd. | 0.1 |
| Tetradecanol           | 1675/1676 | nd. | nd. | nd. | 0.1 | nd. | tr. | nd. | 0.1 | nd. | nd. |
| Heptadecane            | 1700/1700 | nd. | nd. | tr. | 0.1 | nd. | tr. | tr. | 0.1 | tr. | 0.1 |
| Pentadecanal           | 1715/1714 | nd. | nd. | tr. | 0.1 | nd. | tr. | tr. | 0.1 | tr. | 0.1 |
| Benzyl benzoate        | 1760/1760 | tr. | nd. | 0.1 | 0.2 | nd. | tr. | tr. | tr. | tr. | tr. |
| Anthracene             | 1786/1786 | nd. | nd. | nd. | 0.1 | nd. | tr. | nd. | nd. | tr. | nd. |
| Octadecane             | 1800/1800 | nd. | nd. | nd. | 0.1 | nd. | tr. | nd. | tr. | nd. | nd. |
| Phytone                | 1841/1842 | tr. | tr. | 0.1 | 0.3 | nd. | tr. | tr. | 0.1 | 0.1 | 0.1 |
| Benzyl salicylate      | 1864/1864 | nd. | nd. | 0.1 | nd. |
| Hexadecanol            | 1883/1884 | tr. | nd. | nd. | nd. | nd. | 0.1 | nd. | 0.1 | 0.1 | 0.1 |

|                          |           |             |             |             |             |              |             |             |             |             |             |
|--------------------------|-----------|-------------|-------------|-------------|-------------|--------------|-------------|-------------|-------------|-------------|-------------|
| Nonadecane               | 1900/1900 | tr.         | nd.         | nd.         | 0.1         | nd.          | tr.         | nd.         | nd.         | nd.         | 0.1         |
| 2-Heptadecanone          | 1902/1902 | 0.5         | 0.2         | 0.9         | 1.3         | 0.7          | 0.3         | 0.9         | 1.3         | 1.3         | 1.4         |
| Unknown                  |           | nd.         | nd.         | nd.         | 0.1         | 0.1          | nd.         | nd.         | nd.         | nd.         | nd.         |
| Unknown                  |           | nd.         | nd.         | nd.         | nd.         | 0.1          | nd.         | nd.         | nd.         | nd.         | nd.         |
| Unknown                  |           | nd.         | nd.         | nd.         | nd.         | 0.1          | nd.         | nd.         | nd.         | 0.2         | nd.         |
| Eicosane                 | 2000/2000 | 0.1         | tr.         | 0.1         | tr.         | 0.1          | nd.         | nd.         | nd.         | nd.         | nd.         |
| 2-Nonadecanone           | 2090/2091 | tr.         | 0.1         | 0.3         | tr.         | 0.2          | 0.3         | 0.2         | 0.5         | 0.4         | 0.1         |
| Unknown                  |           | nd.         | nd.         | nd.         | 0.7         | 0.1          | nd.         | 0.1         | nd.         | nd.         | 0.3         |
| Heneicosane              | 2100/2100 | nd.         | 0.8         | nd.         | 0.1         | 1.7          | nd.         | 0.1         | 0.2         | nd.         | 0.2         |
| Phytol                   | 2106/2106 | tr.         | nd.         | 0.1         | 0.2         | nd.          | 0.1         | 0.1         | 0.2         | 0.1         | 0.2         |
| Unknown                  |           | nd.         | nd.         | 1.6         | 0.6         | nd.          | 0.2         | nd.         | 0.3         | 0.1         | 0.2         |
| Docosane                 | 2200/2200 | nd.         | nd.         | 0.8         | 8.4         | 0.1          | 0.8         | tr.         | 2.5         | 0.8         | 2.2         |
| Unknown                  |           | nd.         | nd.         | nd.         | nd.         | 0.1          | nd.         | nd.         | 0.2         | nd.         | nd.         |
| Tricosane                | 2300/2300 | nd.         | nd.         | nd.         | 0.7         | 0.2          | 0.1         | 1.8         | 0.4         | nd.         | 0.2         |
| Tetracosane              | 2400/2400 | nd.         | nd.         | 0.7         | 5.9         | 1.0          | 0.3         | 0.7         | 0.9         | nd.         | 0.7         |
| <b>Total</b>             |           | <b>98.8</b> | <b>99.3</b> | <b>98.8</b> | <b>96.6</b> | <b>100.0</b> | <b>98.8</b> | <b>98.9</b> | <b>98.4</b> | <b>99.0</b> | <b>99.0</b> |
| Monoterpene hydrocarbons |           | 0.1         | 0.2         | 0.1         | 0.1         | 0.1          | 0.1         | 0.1         | 0.1         | 0.1         | 0.1         |
| Oxygenated monoterpenes  |           | 0.7         | 0.7         | 1.1         | 2.5         | 0.6          | 0.5         | 0.9         | 2.3         | 1.2         | 1.5         |

|                            |      |      |      |      |      |      |      |     |      |      |
|----------------------------|------|------|------|------|------|------|------|-----|------|------|
| Sesquiterpene hydrocarbons |      |      |      | 0.5  |      |      |      |     |      |      |
| Oxygenated sesquiterpenes  |      |      |      | 0.2  |      |      |      | 0.2 |      | 0.3  |
| Simple phenols             | 94.0 | 94.8 | 89.1 | 64.2 | 92.8 | 89.9 | 89.5 | 82  | 88.7 | 83.6 |
| Aldehydes                  | 2.4  | 2.2  | 2.7  | 7.0  | 1.9  | 4.6  | 3.0  | 4.8 | 4.2  | 5.0  |
| Alcohols                   |      |      | 0.1  | 0.8  |      | 0.4  | 0.1  | 0.6 | 0.2  | 0.7  |
| Ketones                    | 0.5  | 0.3  | 1.2  | 1.6  | 0.9  | 0.7  | 1.1  | 1.9 | 1.7  | 1.6  |

---

RI<sup>Lit.</sup>: retention indices (Adams, 2007); RI<sup>Calc.</sup>: retention indices relative to C<sub>7</sub>-C<sub>30</sub> *n*-alkanes on Rxi-5MS column; nd. – not detected.
